# Supplementary material for: Health Policy for Prostate Cancer Early Detection in the European Union and the Impact of Opportunistic Screening: PRAISE-U Consortium
Source: MDPI journal article supplement (doi:10.3390/jpm14010084), 2024-01-11
Supplement: s1 [file s1]

## Supplementary Materials S1- Search Strategy

prostate cancer screening policy

**grey literature**

**google scholar**

**google**

**policy commons**

**embase**

('prostate tumor'/exp OR 'prostate specific antigen'/de OR 'digital rectal examination'/de OR 'prostate biopsy'/de OR (prostate/exp AND ('nuclear magnetic resonance imaging'/exp OR echography/exp)) OR ((prostat\* NEAR/6 (tumor\* OR tumour\* OR cancer\* OR neoplas\* OR antigen\* OR ultraso\* OR mri OR magnetic-resonan\* OR biops\*)) OR psa OR (digital\* NEAR/3 rectal\* NEAR/3 examinat\*) OR proPSA OR fPSA OR Prostate-Health-Index):ab,ti,kw)

AND

(screening/de OR 'mass screening'/de OR 'screening test'/de OR rescreening/de OR 'cancer screening'/de OR 'early cancer diagnosis'/de OR 'early diagnosis'/de OR (screening OR rescreening OR (early NEAR/3 (deect\* OR diagnosis))):ab,ti,kw)

AND

(policy/exp OR politics/de OR Government/de OR 'political activism'/de OR lobbying/exp OR 'health insurance'/de OR reimbursement/de OR 'biomedical technology assessment'/de OR (policy OR policies OR politic\* OR Government\* OR lobby\* OR insurance\* OR reimburse\* OR re-imburse\* OR biomedical-technology-assessment\* OR health-technology-assessment\*):ab,ti,kw)

AND

('European Union'/de OR 'EU citizen'/exp OR Austria/de OR Belgium/de OR Bulgaria/de OR Croatia/de OR Cyprus/de OR 'Czech republic'/de OR Denmark/de OR 'The netherlands'/de OR Estonia/de OR Finland/de OR France/de OR Germany/de OR Greece/de OR Hungary/de OR Ireland/de OR Italy/de OR Latvia/de OR Lithuania/de OR Malta/de OR Poland/de OR Portugal/de OR Romania/de OR Slovakia/de OR Slovenia/de OR Spain/de OR Sweden/de OR (European-Union OR Austrian\* OR Belgian\* OR Bulgarian\* OR Croatian\* OR Cypriot\* OR Czech\* OR Danish\* OR Dutch\* OR Estonian\* OR Finn\* OR French\* OR German\* OR Greek\* OR Hungarian\* OR Irish\* OR Italian\* OR Latvian\* OR Lithuanian\* OR Maltese\* OR Polish\* OR Portuguese\* OR Romanian\* OR Slovak\* OR Slovenian\* OR Spaniard\* OR Swedish\* OR Austria\* OR Belgium\* OR Bulgaria\* OR Croatia\* OR Cyprus\* OR Denmark\* OR netherland\* OR Estonia\* OR Finland\* OR France\* OR Germany\* OR Greece\* OR Hungary\* OR Ireland\* OR Italy\* OR Latvia\* OR Lithuania\* OR Malta\* OR Poland\* OR Portugal\* OR Romania\* OR Slovakia\* OR Slovenia\* OR Spain\* OR Sweden\*):ab,ti,kw)

**Mesh: Policy Making**
